# Supplementary material
Source: publisher figshare collection journal article supplement (https://diabetesjournals.figshare.com/articles/dataset/_/20503266)
Supplement: Supplementary file 1 [file 36704601]

## Online Supplemental Materials

REDD1 ablation attenuates development of renal complication in diabetic mice

*Sunilkumar et al, 2022*

### Table of Contents:

1. Table S1: Antibody information
2. Table S2: PCR primer sequences
3. Figure S1: Diabetes induced mTORC1 activation is not attenuated with REDD1 deletion
4. Figure S2: GSK3 $\beta$  inhibition attenuates diabetes-induced renal dysfunction
5. Figure S3: GSK3 $\beta$  inhibition prevents diabetes-induced podocyte loss

**Table S1. Antibody information**

| Assay                                  | Antibody                                  | Source         | Dilution            | Catalog #   | Lot#     |    |
|----------------------------------------|-------------------------------------------|----------------|---------------------|-------------|----------|----|
| Western blotting                       | REDD1                                     | ProteinTech    | 1:500               | 10638-1-AP  | 95508    |    |
|                                        | Podocin                                   | Sigma          | 1:2000              | P0372       | 115575   |    |
|                                        | GAPDH                                     | Santa Cruz     | 1:2000              | sc-47724    | H1021    |    |
|                                        | phospho GSK3 $\beta$ (Ser 9)              | Cell Signaling | 1:1000              | 5558        | 10       |    |
|                                        | GSK3 $\beta$                              |                | 1:1000              | 12456       | 10       |    |
|                                        | phospho glycogen synthase (Ser 641)       |                | 1:1000              | 3891        | 2        |    |
|                                        | Cleaved caspase 3                         |                | 1:1000              | 9664        | 47       |    |
|                                        | Phospho-S6 Ribosomal Protein (Ser240/244) |                | 1:1000              | 5364        | 8        |    |
|                                        | S6 Ribosomal Protein                      |                | 1:1000              | 2317        | 4        |    |
|                                        | HA-tag                                    |                | 1:1000              | 3724        | 10       |    |
|                                        | Actin                                     |                | 1:1000              | 4970        | 19       |    |
|                                        | Goat anti-rabbit IgG-HRP                  |                | Bethyl Laboratories | 1:10000     | A120-101 | 44 |
|                                        | Goat anti-mouse IgG-HRP                   |                |                     | 1:10000     | A90-116  | 43 |
|                                        | IHC                                       | Fibronectin    | Cell Signaling      | 1:1000      | 26836    | 3  |
| Nitro-Tyrosine                         |                                           | 1:1000         |                     | 9691        | 3        |    |
| phospho GSK3 $\beta$ (Ser 9)           |                                           | 1:500          |                     | 5558        | 10       |    |
| GSK3 $\beta$                           |                                           | 1:1000         |                     | 12456       | 10       |    |
| WT1                                    |                                           | 1:100          |                     | 83535       | 1        |    |
| Donkey anti-Rabbit IgG-Alexa Fluor 647 |                                           | Jackson        | 1:1000              | 711-605-152 | 159933   |    |

**Table S2. PCR primer sequences**

| Species | Target        | Forward sequence (5' - 3') | Reverse sequence (5' - 3') |
|---------|---------------|----------------------------|----------------------------|
| Mouse   | REDD1         | GGGATCGTTTCTCGTCCTCC       | ATGAGGAGTCTTCCTCCGGC       |
|         | TGF $\beta$ 1 | CCCGAAGCGGACTACTATGC       | CATAGATGGCGTTGTTGCGG       |
|         | Fibronectin   | CGACGTGACAGAGACCACAA       | CTGGAGTCAAGCCAGACACA       |
|         | $\alpha$ SMA  | GAGGCACCACTGAACCCTAA       | CATCTCCAGAGTCCAGCACA       |
|         | Collagen 1A1  | GAGAACCAGCAGAGCCA          | GAACAAGTGACAGAGGCATA       |
|         | E-cadherin    | GGTTTTCTACAGCATCACCG       | GCTTCCCATTGATGACAC         |
|         | GAPDH         | GGTGGTCTCCTCTGACTTCAACA    | GTTGCTGTAGCCAAATTCGTTGT    |
| Human   | REDD1         | CTCTTCGCCCTCGTCCTTG        | TCCAGGTAAGCCGTGTCTTC       |
|         | GCLC          | GTTCTCAAGTGGGGCGATGA       | TTCTCCCCAGACAGGACCAA       |
|         | GCLM          | ATGGCCTGTTTCAGTCCTTGG      | CTCGTGCGCTTGAATGTCAG       |
|         | HO-1          | TGACCCATGACACCAAGGAC       | GGGGCAGAATCTTGCACTTT       |
|         | NQO-1         | TGATATTCCAGTTCCTCCCTGC     | TGGCAGCGTAAGTGTAAGCA       |
|         | GAPDH         | GTTGTCTCCTGCGACTTCA        | TGCTGTAGCCGTATTCATTG       |

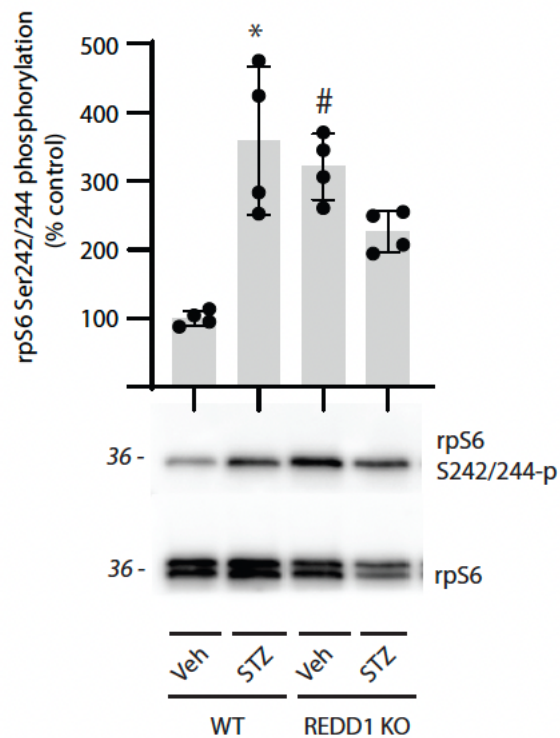

**Figure S1: Analysis of ribosomal protein S6 phosphorylation in renal tissue lysates.** Diabetes was induced in wildtype (WT) and REDD1 knockout (KO) mice by administration of streptozotocin (STZ). All analyses were performed 16 weeks after mice were administered STZ or a vehicle (Veh). Phosphorylation of ribosomal protein S6 at ser 240/244 was assayed in renal tissue homogenates by western blotting. Data are presented as means  $\pm$  SD. Statistical significance was denoted as \*  $p < 0.05$  vs. Veh, #  $p < 0.05$  vs. WT.

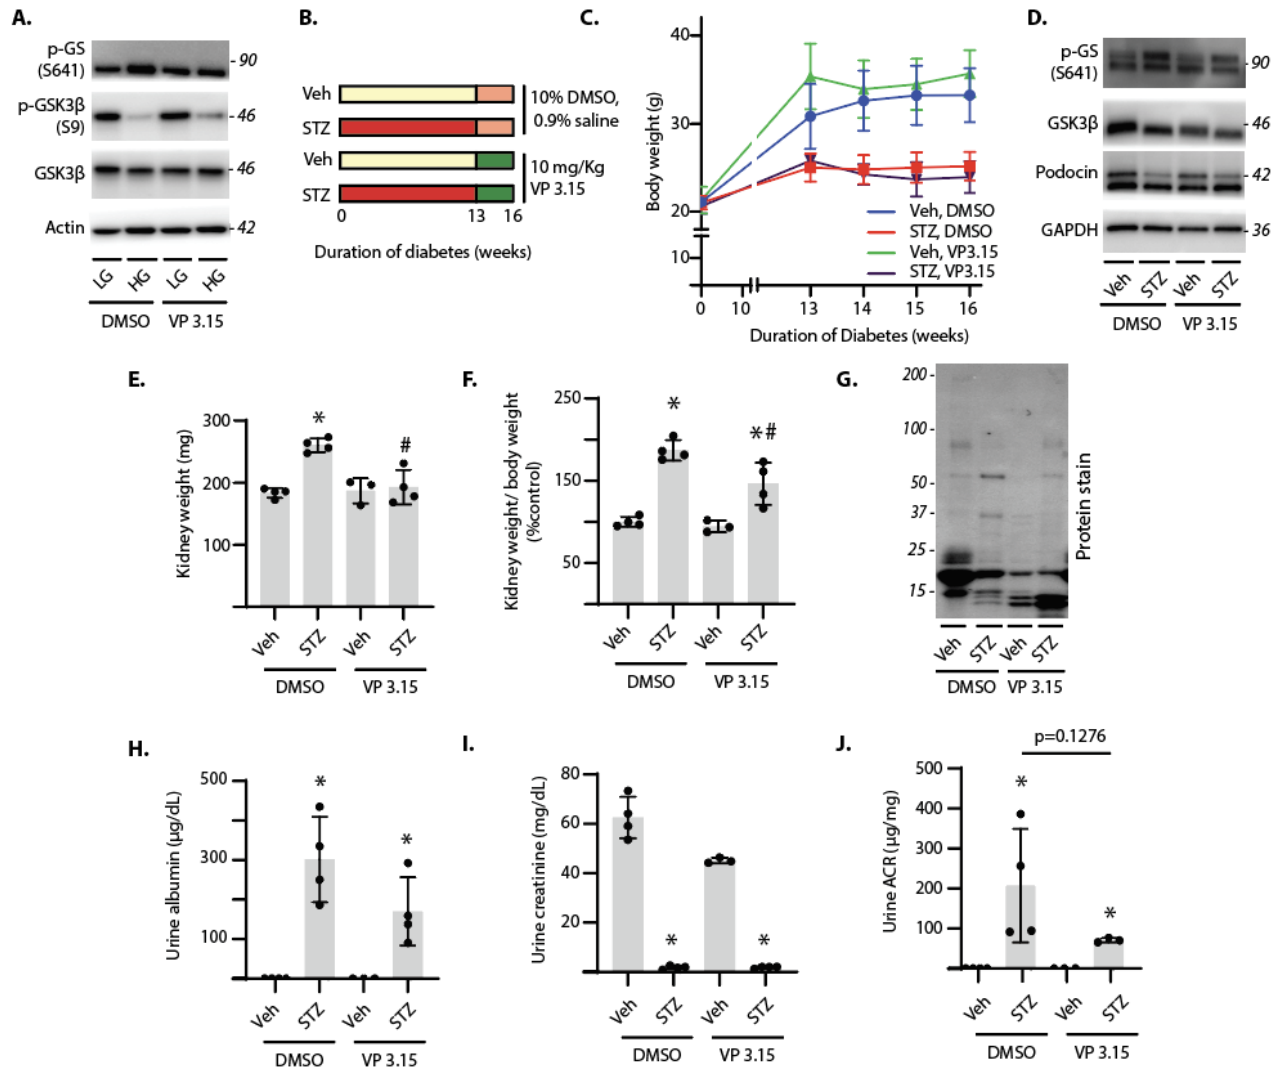

**Figure S2: GSK3β inhibition attenuates diabetes-induced renal dysfunction.** *A*, Conditionally immortalized human podocytes (CHIP) were exposed to hyperglycemic conditions in the presence or absence of 1 μM VP3.15. Glycogen Synthase (GS) phosphorylation at Ser641, Glycogen Synthase Kinase 3β (GSK3β) phosphorylation at Ser9, GSK3β, REDD1 and actin expression were evaluated by western blotting. Representative blots are shown with molecular mass indicated on the *right* of each blot. *B-J*, Mice were administered either streptozotocin (STZ) to induce diabetes or a vehicle (Veh) control. After 13 weeks of diabetes, mice were administered 10 mg/kg VP3.15 or DMSO vehicle alone daily for 3 weeks (*B*). Body weights of mice were compared during VP3.15 treatment (*C*). After 16 weeks of diabetes, GS phosphorylation, GSK3β, REDD1, podocin and GAPDH were determined in kidney tissue homogenates by western blotting (*D*). Kidney weights were compared (*E*). Urinary protein was separated by SDS-PAGE and visualized by protein stain (*G*). Urine was assayed for albumin (*H*) and creatinine levels (*I*). Urine albumin to creatinine ratio (ACR) was determined (*J*). Data are presented as means ± SD. Statistical significance was denoted as \* p < 0.05 vs. Veh; # p < 0.05 vs. DMSO.

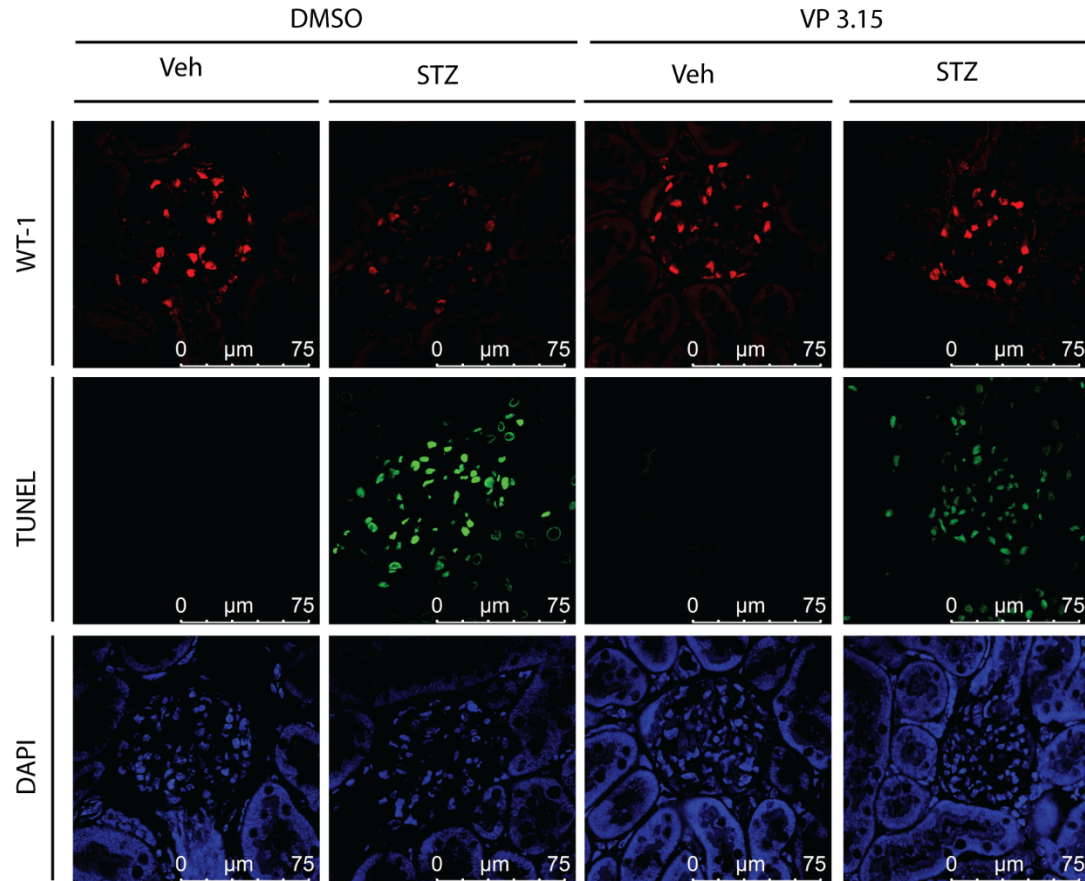

**Figure S3: GSK3 $\beta$  inhibition prevents diabetes-induced podocyte loss.** Diabetes was induced by administration of streptozotocin (STZ). Non-diabetic mice received a vehicle control (Veh). After 13 weeks of diabetes, mice received either 10 mg/Kg VP3.15 or DMSO vehicle alone daily for 3 weeks. After 16 weeks of diabetes formalin-fixed paraffin-embedded sections (6  $\mu$ m) were prepared from kidneys. Immunohistochemistry was used to localize the podocyte marker WT1 (*red*) and TUNEL staining (*green*) was used to detect apoptotic nuclei. Sections were counterstained with DAPI (*blue*) and imaged using the Leica SP8 confocal laser microscope. Representative micrographs are shown (600 X magnification; scale bar 75  $\mu$ m).
